## RESEARCH ARTICLE

# Association between systolic blood pressure and low-density lipoprotein cholesterol with coronary heart disease according to age

Nelson Wang<sup>1,2,3</sup>, Rima Mustafa<sup>4,5</sup>, Verena Zuber<sup>4</sup>, Anthony Rodgers<sup>1,4</sup>, Abbas Dehghan<sup>4,5,6\*</sup>

**1** The George Institute for Global Health, University of New South Wales, Sydney, Australia, **2** Royal Prince Alfred Hospital, Sydney, Australia, **3** Sydney Medical School, University of Sydney, Sydney, Australia, **4** Department of Epidemiology and Biostatistics, Imperial College London, London, United Kingdom, **5** UK Dementia Research Institute, Imperial College London, London, United Kingdom, **6** MRC Centre for Environment and Health, Imperial College London, London, United Kingdom

☞ These authors contributed equally to this work.

\* [a.dehghan@imperial.ac.uk](mailto:a.dehghan@imperial.ac.uk)

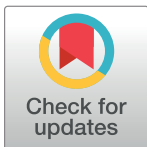

## OPEN ACCESS

**Citation:** Wang N, Mustafa R, Zuber V, Rodgers A, Dehghan A (2023) Association between systolic blood pressure and low-density lipoprotein cholesterol with coronary heart disease according to age. PLoS ONE 18(12): e0295004. <https://doi.org/10.1371/journal.pone.0295004>

**Editor:** Tariq Jamal Siddiqi, The University of Mississippi Medical Center, UNITED STATES

**Received:** July 8, 2023

**Accepted:** November 14, 2023

**Published:** December 20, 2023

**Copyright:** © 2023 Wang et al. This is an open access article distributed under the terms of the [Creative Commons Attribution License](https://creativecommons.org/licenses/by/4.0/), which permits unrestricted use, distribution, and reproduction in any medium, provided the original author and source are credited.

**Data Availability Statement:** Access to the individual-level data in UK Biobank is dependent on an application directly to the UK Biobank through its standard application process (<https://www.ukbiobank.ac.uk/>). The age-specific summary-level data underlying our analysis can be found in the Supplementary Materials. The summary-level data on LDL-cholesterol and systolic blood pressure can be accessed through the Global Lipids Genetics Consortium (GLGC) (<http://www.lipidgenetics.org/>) and International Consortium on Blood Pressure (ICBP) (<https://www.ncbi.nlm.nih.gov/>).

## Abstract

### Background

The impact of elevated systolic blood pressure (SBP) and low-density lipoprotein cholesterol (LDL-C) on the risk of coronary heart disease (CHD) at different stages of life is unclear. We aimed to investigate whether genetically mediated SBP/LDL-C is associated with the risk of CHD throughout life.

### Methods and findings

We conducted a three-sample Mendelian randomization analysis using data from the UK Biobank including 136,648 participants for LDL-C, 135,431 participants for SBP, and 24,052 cases for CHD to assess the effect of duration of exposure to the risk factors on risk of CHD. Analyses were stratified by age at enrolment. In univariable analyses, there was a consistent association between exposure to higher LDL-C and SBP with increased odds of incident CHD in individuals aged  $\leq 55$  years,  $\leq 60$  years, and  $\leq 65$  years (p-value for heterogeneity = 1.00 for LDL-C and 0.67 for SBP, respectively). In multivariable Mendelian randomization analyses, exposure to elevated LDL-C/SBP early in life (age  $\leq 55$  years) was associated with a higher risk of CHD independent of later life levels (age  $> 55$  years) (odds ratio 1.68, 95% CI 1.20–2.34 per 1 mmol/L LDL-C, and odds ratio 1.33, 95% CI 1.18–1.51 per 10 mmHg SBP).

### Conclusions

Genetically predicted SBP and LDL-C increase the risk of CHD independent of age. Elevated SBP and LDL-C in early to middle life is associated with increased CHD risk independent of later-life SBP and LDL-C levels. These findings support the importance of lifelong risk factor control in young individuals, whose risk of CHD accumulates throughout life.

[gov/projects/gap/cgi-bin/study.cgi?study\\_id=phs000585.v2.p1](https://doi.org/10.1371/journal.pone.0295004)).

**Funding:** The author(s) received no specific funding for this work.

**Competing interests:** RM was supported by the President's PhD Scholarship from Imperial College London. This does not alter our adherence to PLOS ONE policies on sharing data and materials.

## Introduction

Elevated low density lipoprotein cholesterol (LDL-C) and systolic blood pressure (SBP) remain the leading global contributors to coronary heart disease (CHD) [1]. Mendelian randomisation (MR) studies use genetic variants to investigate the causal relationship between a biomarker (such as LDL-C and SBP) on risk of disease (such as CHD). Prior Mendelian randomisation (MR) studies have shown very large reductions in coronary heart disease associated with life-long exposures to lower SBP and LDL cholesterol (approximately 50% reduction in CHD per mmol/L lower LDL-C and 10 mmHg lower SBP) [2–4]. These results contrast to the smaller associations between these risk factors and CHD from randomized clinical trials of BP and cholesterol lowering therapies (approximately 20% reduction in CHD per 1 mmol/L lower LDL-C and 10 mmHg lower SBP) [5–7]. This discrepancy raises questions about the impact of duration of exposure on the relationship between these risk factors and CHD, and the potential implications for the management of these conditions.

Currently, therapeutic strategies for cholesterol and BP lowering are based on short-term clinical trials. If longer exposure to high cholesterol and blood pressure has a cumulative effect as reported by MR studies, this will have substantial implications for the management of CHD. There may be a role for earlier treatment in low-risk and younger patients if there are indeed additional benefits with cumulative risk factor control. A prior MR found consistent evidence of higher genetically predicted mean arterial pressure at age  $\leq 55$  years increasing coronary heart disease risk after adjusting for genetically predicted mean arterial pressure at age  $> 55$  years [8]. Whether this finding is consistent for both SBP and LDL-C, and whether a trend for risk across different age groups exists remains unknown. Furthermore, another recent MR analysis showed that elevated BP and LDL-C may not be associated with CHD at older ages, and concluded that BP and LDL-C lowering may not be warranted in subgroups of older patients [9]. However, this analysis was based on one-sample MR which is prone to overfitting and biased towards confounded observational estimates as the genetic associations for exposure and outcome are derived from the same sample [10].

To address these gaps in the knowledge, the current study aimed to generate genetic instruments for SBP and LDL-C at different age cut-offs and investigate whether genetically elevated SBP and LDL-C are associated with the risk of CHD throughout life. To answer the issue of whether the risk of SBP and LDL-C is dependent on the duration of exposure, we assessed the impact of SBP and LDL-C at a younger age on the risk of CHD independent of later age SBP and LDL-C. The findings of this study could have significant implications for the management of CHD and the use of early treatment in lower-risk and younger patients.

## Methods

### Study population

This study used individual-level data from participants in the UK Biobank, a large prospective cohort of ~500,000 participants in the United Kingdom [11]. We included 450,782 participants enrolled between the years 2006 and 2010 and followed up through the year 2020. We included participants of European ancestries and exclude related participants based on a kinship coefficient  $> 0.088$ , which is the proposed lower-limit kinship-coefficient threshold for a second-degree relative [12]. BP measurements were performed twice after the participant had been at rest for at least 5 minutes in the seated position with a digital sphygmomanometer (Omron 705 IT; OMRON Healthcare Europe B.V., Hoofddorp, the Netherlands) and the average of the two measurements was used for the analyses. LDL-C was measured directly in mmol/L (analytical range: 0.26–10.3) using Enzymatic Selective Protection analysis

methodology using the Beckman Coulter AU5800 platform (Beckman Coulter (UK), Ltd) [13]. When participants reported the use of cholesterol-lowering medication during the assessment, LDL-C levels were divided by 0.7; when participants reported the use of blood pressure lowering medication, 15 mmHg was added to the measured systolic blood pressure [14]. We divided the population into four groups according to age at enrolment:  $\leq 55$  years, 55–60 years, 61–65 years and  $\geq 65$  years, which divided the cohort into approximate quarters. To ensure that the genetic associations for exposure and outcome in the univariable MR analysis were not overlapping, we randomly divided the participants in each age group into two subgroups for the exposure (SBP or LDL-C) and outcome (CHD) analysis. This ensured that each participant contributed only to one subgroup and that the genetic associations for exposure and outcome were derived from non-overlapping participants.

### Study outcome

The primary outcome of the study was CHD defined as a composite of coronary death, nonfatal myocardial infarction, or coronary revascularization. The exact diagnostic codes can be found in the [S1 Appendix](#). We first combined both incident and prevalent cases of CHD to maximize power, under the implicit assumption that all events occur incident to a genetic exposure. We also looked at incident CHD only, such that each age group had at least that many years of exposure to different levels of LDL-C and SBP (i.e., at least 55 years of exposure in the age 55–60 years group).

### Statistical analysis

To assess the effect of genetically determined SBP and LDL-C levels on the risk of CHD in different age groups, we performed a three-sample univariable MR and multivariable MR analysis. Genetic instruments for SBP and LDL-C were obtained from summary statistics from the largest Genome-Wide Association Studies (GWAS) conducted by the International Consortium of Blood Pressure (ICBP) [15] and the Global Lipids Genetics Consortium (GLGC) [16], respectively. The selection of instruments from these external datasets that did not include the UK Biobank could reduce potential bias from winner's curse. Instruments were defined as single nucleotide polymorphisms (SNPs) associated with SBP or LDL-C at  $P < 5 \times 10^{-8}$  and uncorrelated ( $r^2 < 0.001$ ). Analyses were stratified based on the age of enrolment to assess the effect of duration of risk factor exposure on the risk of CHD, given that genetically determined SBP and LDL-C equate to a lifelong exposure.

We obtained age-group-specific estimates for the exposures (SBP and LDL-C separately) using a linear mixed-model implemented in BOLT-LMM after dividing participants into age groups (age  $\leq 55$  years, 55–60 years, 61–65 years and  $\geq 65$  years) and ensuring no overlap of participants between the exposure and outcome [17]. The genetic estimates for CHD as the outcome was obtained using logistic regression within an independent cohort of participants in the same age group. Both linear and logistic regressions were conducted with adjustment for age, sex, and the first five genetic principal components.

We estimated the association between 1 mmol/L higher LDL-C and 10 mmHg higher SBP on the risk of CHD to allow for easier comparison with traditional pharmacological therapies for BP and cholesterol-lowering. The exposure allele for each variant was defined as the allele associated with higher SBP and LDL-C. Multiplicative random-effects inverse-variance-weighted MR was used as the main analysis to assess the effect of genetically predicted SBP and LDL-C on CHD. MR Egger and weighted median methods were used to explore the robustness of the findings to potential pleiotropic variants [18]. Agreement among different MR methods supports a robust estimation of causal effects. In the main analysis, we used the

same set of instruments from ICBP and GLGC for all age groups and obtained age-specific estimates for those instruments. We then excluded any weak instruments ( $F$ -statistics  $< 10$ ). Finally, MRPRESSO was used to obtain corrected estimates in the presence of outliers among instruments [19]. Conditional  $F$ -statistics were calculated to assess the strength of instruments in the multivariable MR analysis [20].

Univariable MR analyses were conducted to estimate the association between LDL-C and SBP across the four age groups. First, we assessed the association between the exposure and total CHD (incident and prevalent cases) within the same age group, i.e. genetically predicted LDL-C and SBP at age  $\leq 55$  on prevalent and incident CHD risk in the same cohort. Given different ages of prevalent CHD may result in different durations of risk factor exposure, we further assessed the association of genetically predicted LDL-C and SBP on the risk of incident CHD after the age of enrolment, i.e., the association between genetically predicted LDL-C and SBP at age  $\leq 55$  years on CHD risk after age 55 years, LDL-C and SBP at age  $\leq 60$  years on CHD risk after age 60 years, and LDL-C and SBP at age  $\leq 65$  years on CHD risk after age 65 years.

To estimate the effect of genetically predicted SBP and LDL-C at age  $\leq 55$  years on total CHD risk independent of genetically predicted SBP and LDL-C at age  $\geq 55$  years, multivariable MR was performed. Age 55 years was chosen to divide the UK Biobank cohort into approximately half. For the multivariable MR, genetic instruments were selected as independent genetic variants associated with at least one of the exposures (risk factor at certain age groups) at  $P < 1 \times 10^{-5}$ .

All analyses were performed using R (version 3.2.2; R Project for Statistical Computing). A 2-tailed  $P$  value less than .05 was considered statistically significant. The data used in these analyses are publicly available. The UK Biobank study was approved by the North West Multi-centre Research Ethics Committee, and all its participants provided informed written consent that was witnessed by a staff member. All accessed data from the UK Biobank were deidentified. The UK Biobank phenotype data were accessed through application 52569, and the genetic data were from application 236.

## Results

A total of 450,782 participants in the UK Biobank were considered in our analysis. Our analysis included 136,648 participants for LDL-C and 135,431 participants for SBP. Table 1 shows the baseline characteristics according to the age of enrolment, with four groups: age  $\leq 55$  years, 55–60 years, 61–65 years and  $\geq 65$  years. Mean SBP increased with increasing age, and the use of antihypertensives followed a similar trend. LDL-C was highest in those aged 56–60 years, however, the use of lipid-lowering therapy increased with older age. For CHD, there was a total of 24,052 cases (incident and prevalent), with most cases occurring over the age of 60 years.

All instruments and genetic association estimates used in the MR analyses are provided in S1 Table in S1 Appendix. The correlation of genetic association estimates across age groups were relatively high (range: 0.90–0.96 for LDL-C and 0.77–0.83 for SBP).

### Genetically predicted SBP and LDL-C and total CHD

The results from the univariable MR showed a significant association between genetically predicted LDL-C and risk of CHD across all four age groups with no evidence of significant heterogeneity between groups ( $p$ -value for heterogeneity = 0.107) (Fig 1). Each 1 mmol/L higher LDL-C was associated with 81% higher odds of CHD at age  $\leq 55$  years, 52% higher odds at age 55–60 years, 106% higher odds at age 61–65 years and 60% higher odds at age  $\geq 65$  years. We

Table 1. Patient characteristics according to age at enrolment.

|                                                | Systolic blood pressure |             |             |            | Low-density lipoprotein cholesterol |               |               |              |
|------------------------------------------------|-------------------------|-------------|-------------|------------|-------------------------------------|---------------|---------------|--------------|
|                                                | age ≤ 55                | age 56–60   | age 61–65   | age > 65   | age ≤ 55                            | age 56–60     | age 61–65     | age > 65     |
| Number                                         | 56,710                  | 27,035      | 32,603      | 19,083     | 57,549                              | 27,279        | 32,611        | 19,209       |
| Age, y (mean ± SD)                             | 48 ± 4                  | 58 ± 1      | 63 ± 1      | 67 ± 1     | 48 ± 4                              | 58 ± 1        | 63 ± 1        | 67 ± 1       |
| Males, No. (%)                                 | 24,769 (44)             | 11,613 (43) | 14,428 (44) | 8,892 (47) | 25,056 (43.5)                       | 11,729 (43.0) | 14,395 (44.1) | 8,953 (46.6) |
| Body mass index, kg/m <sup>2</sup> (mean ± SD) | 27 ± 5                  | 27 ± 5      | 27 ± 5      | 27 ± 4     | 27 ± 5                              | 27 ± 5        | 27 ± 5        | 27 ± 4       |
| Smoker, No. (%)                                |                         |             |             |            |                                     |               |               |              |
| Current                                        | 7,155 (13)              | 2,616 (10)  | 2,629 (8)   | 1,320 (7)  | 7,227 (13)                          | 2,644 (10)    | 2,637 (8)     | 1,339 (7)    |
| Former                                         | 15,819 (28)             | 9,897 (37)  | 13,397 (41) | 8,148 (43) | 16,039 (28)                         | 9,928 (36)    | 13,460 (41)   | 8,166 (43)   |
| Never                                          | 33,602 (59)             | 14,421 (53) | 16,447 (50) | 9,505 (50) | 34,141 (59)                         | 14,607 (54)   | 16,386 (50)   | 9,596 (50)   |
| LDL-C, mmol/L (mean ± SD)                      | 3.5 ± 0.8               | 3.7 ± 0.9   | 3.6 ± 0.9   | 3.6 ± 0.9  | 3.5 ± 0.8                           | 3.7 ± 0.9     | 3.6 ± 0.9     | 3.6 ± 0.9    |
| SBP, mmHg (mean ± SD)                          | 133 ± 17                | 141 ± 19    | 145 ± 19    | 149 ± 20   | 133 ± 17                            | 141 ± 19      | 145 ± 19      | 149 ± 20     |
| DBP, mmHg (mean ± SD)                          | 82 ± 11                 | 83 ± 11     | 83 ± 10     | 82 ± 10    | 82 ± 11                             | 83 ± 11       | 83 ± 10       | 82 ± 10      |
| Current lipid-lowering treatment, No. (%)      | 3,244 (6)               | 3,895 (14)  | 7,159 (22)  | 5,533 (29) | 3,279 (6)                           | 3,921 (14)    | 7,187 (22)    | 5,552 (29)   |
| Current BP lowering treatment, No. (%)         | 4,737 (8)               | 5,186 (19)  | 8,727 (27)  | 6,410 (34) | 4,848 (8)                           | 5,259 (19)    | 8,788 (27)    | 6,457 (34)   |
| CHD cases (prevalent and incident)             | 3,826                   | 4,423       | 8,189       | 7,614      | 3,826                               | 4,423         | 8,189         | 7,614        |

BP, blood pressure; CHD, coronary heart disease; DBP, diastolic blood pressure; LDL-C, low density lipoprotein cholesterol; SBP, systolic blood pressure.

<https://doi.org/10.1371/journal.pone.0295004.t001>

found an age-dependent association for SBP, such that the effect of genetically predicted SBP on CHD decreased with older age (p-value for heterogeneity = 0.023). For each 10 mmHg increase in genetically mediated SBP, the odds of CHD increased by 62% for individuals aged ≤55 years, 46% for those aged 55–60 years, 30% for those aged 61–65 years and 17% for those aged ≥65 years (Fig 1). Similar results were obtained when performing MR Egger and weighted median methods, which each make different assumptions about the potential inclusion of pleiotropic variants that affect CHD risk through pathways unrelated to SBP and

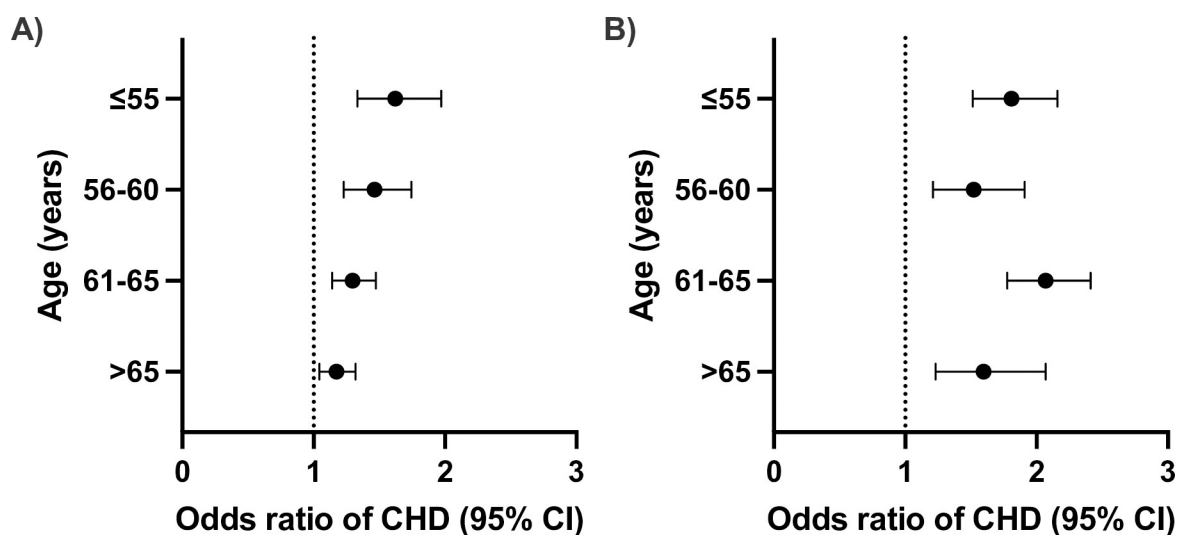

**Fig 1. Effect of systolic blood pressure (SBP) and low-density lipoprotein cholesterol (LDL-C) on total coronary heart disease (CHD) at different ages.** Odds ratio of total CHD for genetically predicted A) SBP and B) LDL-C in univariable Mendelian randomization analyses. The circle and error bars represent the odds ratio and their 95% confidence intervals. All effect estimates are given per 10 mmHg increase in SBP and 1 mmol/L increase in LDL-C.

<https://doi.org/10.1371/journal.pone.0295004.g001>

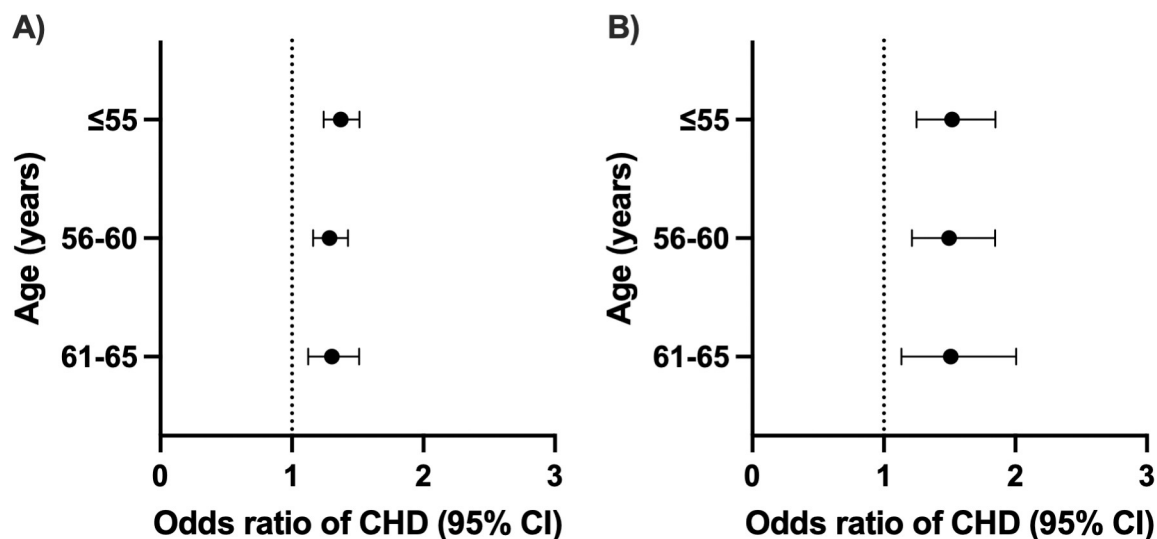

**Fig 2. Effect of systolic blood pressure (SBP) and low-density lipoprotein cholesterol (LDL-C) on incident coronary heart disease (CHD) at different ages.** Odds ratio of total CHD for genetically predicted A) SBP and B) LDL-C in univariable Mendelian randomization analyses. The circle and error bars represent the odds ratio and their 95% confidence intervals. All effect estimates are given per 10 mmHg increase in SBP and 1 mmol/L increase in LDL-C.

<https://doi.org/10.1371/journal.pone.0295004.g002>

LDL-C (S1 Fig in [S1 Appendix](#)). Further sensitivity analysis that excluded outliers by MRPRESSO also showed consistent results (S1 Fig in [S1 Appendix](#)).

### Genetically predicted SBP and LDL-C and incident CHD

Lifetime exposure to genetically predicted SBP and LDL-C was strongly associated with the risk of developing incident CHD in those patients aged  $\leq 55$  years,  $\leq 60$  years and  $\leq 65$  years. Lifelong exposure to 1 mmol/L lower LDL-C was associated with a 52% increase in the odds of incident CHD later in life in those aged  $\leq 55$  years (OR 1.52, 95% CI 1.25–1.85), 50% in those aged  $\leq 60$  years (OR 1.50, 95% CI 1.21–1.85) and 51% in those aged  $\leq 65$  years (OR 1.51, 1.13–2.00) without significant heterogeneity between groups (p-value for heterogeneity = 0.995) ([Fig 2](#)). For SBP, each 10 mmHg higher SBP was associated with a similar increase in odds of CHD at age  $\leq 55$  years (OR 1.30, 95% CI 1.12–1.51), age  $\leq 60$  (OR 1.29, 1.16–1.43) and age  $\leq 65$  (OR 1.37, 95% CI 1.24–1.51) (p-value for heterogeneity = 0.667) ([Fig 2](#)). Similar results were obtained when performing MR egger and weighted median methods (S2 Fig in [S1 Appendix](#)). Further sensitivity analysis that excluded outliers by MRPRESSO also showed consistent results (S2 Fig in [S1 Appendix](#)).

### Genetically predicted SBP and LDL-C at early to middle age on CHD independent of later life levels

Exposure to elevated SBP and LDL-C early in life appears to increase the risk of CHD independent of later-life SBP and LDL-C. Elevated SBP at age  $\leq 55$  years, was associated with increased odds of CHD after adjusting for genetically mediated SBP at age  $> 55$  years (OR 1.33, 95% CI 1.18–1.51) ([Fig 3](#), S5 Table in [S1 Appendix](#)). Similarly elevated LDL-C at age  $\leq 55$  years was associated with increased CHD, independent of genetically mediated LDL-C at age  $> 55$  years (OR 1.68, 95% CI 1.20–2.34) ([Fig 3](#), S5 Table in [S1 Appendix](#)). Genetically mediated SBP and LDL-C levels at later life (age  $> 55$  years) did not have a significant impact on the risk of CHD after adjusting for their effect at a younger age. However, this finding should be interpreted



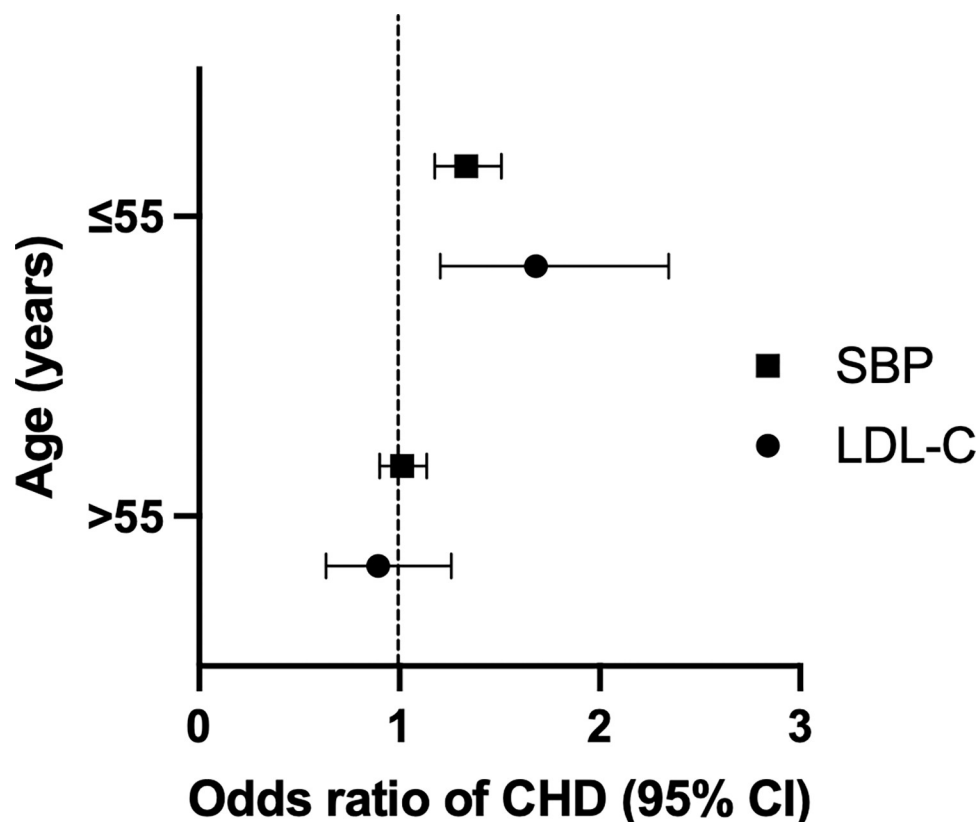

**Fig 3. Multivariable Mendelian randomization analyses for the effect of systolic blood pressure (SBP) and low-density lipoprotein cholesterol (LDL-C) on total coronary heart disease (CHD).** Odds ratio of total CHD for genetically predicted SBP and LDL-C in multivariable Mendelian randomization analyses. Square represents the estimate for SBP, whilst circle represents the estimate for LDL-C, with error bars representing the 95% confidence intervals. All effect estimates are given per 10 mmHg increase in SBP and 1 mmol/L increase in LDL-C.

<https://doi.org/10.1371/journal.pone.0295004.g003>

with caution as the conditional F-statistics in our multivariable MR analysis appeared low (S5 Table in [S1 Appendix](#)).

## Discussion

Based on our MR analyses, we found that genetically predicted SBP and LDL-C increase the risk of incident CHD throughout life, and there appeared to be no attenuation for the effect of SBP and LDL-C on the risk of CHD when one considers incident cases. The present study also found that both SBP and LDL-C in early to middle life (age  $\leq 55$  years) are associated with increased risk of CHD later in life, independent of later life SBP and LDL-C levels. These findings highlight the critical role of cumulative exposure to these risk factors in an individual's risk of CHD, indicating that past exposure to elevated SBP and LDL-C has long-lasting implications on future CHD risk.

We found that the effects of SBP on total CHD cases (incident and prevalent) diminished with older age. This may be explained by the diminishing effects of genetics later in life [21]. For LDL-C, the effects of LDL-C on total CHD were stable with age, which may be due to a mixture of diminishing genetics and the cumulative effect of exposure to high LDL-C. When we limited our analyses to incident cases, which ensure a lifelong exposure to the differing LDL-C and SBP levels at each age group, we found no evidence of heterogeneity between the association of LDL-C and SBP and risk of incident CHD. These results contrast with a

previous MR analysis that showed elevated BP and LDL-C may not be associated with CHD at older ages and concluded that BP and LDL-C lowering may not be warranted in the subgroups of older patients [9]. In this study, the authors used the same weights across all age groups and stratified the participants by age at diagnosis. This analysis was based on one-sample MR which is more prone to overfitting as the genetic associations for exposure and outcome are derived from the same sample, compared to three-sample MR conducted in this study [10].

Our findings suggest that old age alone should not be a reason to withhold otherwise appropriate LDL-C and BP-lowering treatments, because the effect of genetically mediated LDL-C and SBP on the incident risk of CHD is consistent throughout life. Our findings are consistent with randomized controlled trials that suggest the benefits of antihypertensives, and statins are consistent, even in the elderly [22, 23]. Despite this, the use of statins and BP-lowering treatment in the community declines with older age [24, 25]. Some recent guidelines continue to recommend less aggressive BP control in older patients, despite these patients being at higher absolute cardiovascular risk [26]. Of course, the decision to commence or continue BP and cholesterol-lowering therapies should ultimately be based on harm-to-benefit trade-offs.

Previously published randomized clinical trials of BP and cholesterol-lowering therapies, have suggested that a 10 mmHg decrease in SBP is associated with an approximately 20% reduction in CHD, and a 1 mmol/L LDL-C decrease is associated with a 22% reduction in CHD [5–7]. These trials had a treatment duration of 5 to 10 years of follow-up. We have previously shown that increasing durations of LDL-C lowering in randomized trials are associated with increased risk reductions in CHD for each mmol/L lowered, findings that are potentially consistent with the very large reductions in CHD associated with lifelong exposure to lower LDL-C in MR studies [27]. The present study adds to this concept by showing that exposure to elevated LDL-C and SBP earlier in life (i.e. age  $\leq 55$  years) has long-lasting effects on the risk of CHD, independent of later life LDL-C and SBP levels. We also found that genetically mediated LDL-C and SBP at age  $> 55$  years did not affect the risk of CHD at age  $> 55$  years after accounting for LDL-C and SBP at age  $\leq 55$  years. This supports the hypothesis that one's risk of CHD is dependent on the cumulative burden of exposure to a risk factor (i.e. mmHg-years for SBP and mmol/L-years for LDL-C). This suggests that risk algorithms that consider an individual's present-day risk factor level only may not accurately reflect one's cumulative cardiovascular risk [28, 29]. These findings are consistent with a prior MR analysis that showed midlife mean arterial pressure is a predictor of CHD independent of later-life BP [8].

These findings also reinforce the importance of controlling elevated SBP and LDL-C early in life because young individuals with elevated risk factors have decades of future exposure to the elevated risk factor compared to an older patient. Indeed, the use of pharmacological BP and cholesterol lowering in young individuals may raise concerns about long-term safety, the economical and psychological burden of treatment in the young and the lack of randomized trial data in this population. Nevertheless, our study provides important insights into this area, particularly given the conduct of a randomized trial in a young population that spans several decades will be impractical.

Our study has several limitations to discuss. The use of antihypertensive and lipid-lowering medications varied between the different age groups. This has been accounted for by adjusting measured SBP and LDL-C based on the participant's treatment status. It was not possible to exclude the possibility that some of our analyses might have been influenced by weak instrument bias. However, this limitation would bias the results towards the smaller or null effect of SBP and LDL-C on CHD in univariable analyses. In multivariable MR, the weak instruments could bias the magnitude of estimates and could occur in either direction [30]. We demonstrated the existence of strong genetic correlation for exposures across age groups. This suggests that our exposures are associated with the same genetic liability, i.e., the genetic



instruments were not able to distinguish exposure in early versus later life, which could have contributed to the null effect observed in older age in multivariable MR.

In conclusion, genetically predicted SBP and LDL-C increase the risk of CHD independent of age. Exposure to elevated SBP and LDL-C in early to middle life is associated with increased CHD risk independent of later-life SBP and LDL-C levels. These findings support the importance of lifelong risk factor monitoring, and treatment should not be withheld in the elderly based on age alone. Greater emphasis is needed on the treatment of young individuals with elevated SBP and LDL-C, whose risk of CHD accumulates throughout life.

## Supporting information

**S1 Appendix. Supplemental materials containing Tables S1-S5 and Figs S1 and S2.** (DOCX)

## Acknowledgments

The authors acknowledge the GLGC, ICBP, and the UK Biobank and their participants for contributing the data used in this work.

## Author Contributions

**Conceptualization:** Nelson Wang, Anthony Rodgers, Abbas Dehghan.

**Data curation:** Abbas Dehghan.

**Formal analysis:** Rima Mustafa.

**Investigation:** Abbas Dehghan.

**Methodology:** Nelson Wang, Rima Mustafa, Abbas Dehghan.

**Project administration:** Abbas Dehghan.

**Resources:** Rima Mustafa.

**Supervision:** Anthony Rodgers, Abbas Dehghan.

**Writing – original draft:** Nelson Wang, Rima Mustafa.

**Writing – review & editing:** Rima Mustafa, Verena Zuber, Anthony Rodgers, Abbas Dehghan.

## References

1. Roth Gregory A, Mensah George A, Johnson Catherine O, Addolorato G, Ammirati E, Baddour Larry M, et al. Global Burden of Cardiovascular Diseases and Risk Factors, 1990–2019. *J Am Coll Cardiol*. 2020; 76(25):2982–3021. <https://doi.org/10.1016/j.jacc.2020.11.010> PMID: 33309175
2. Ference BA, Yoo W, Alesh I, Mahajan N, Mirowska KK, Mewada A, et al. Effect of long-term exposure to lower low-density lipoprotein cholesterol beginning early in life on the risk of coronary heart disease: a Mendelian randomization analysis. *J Am Coll Cardiol*. 2012; 60(25):2631–9. Epub 2012/10/23. <https://doi.org/10.1016/j.jacc.2012.09.017> PMID: 23083789.
3. Holmes MV, Asselbergs FW, Palmer TM, Drenos F, Lanktree MB, Nelson CP, et al. Mendelian randomization of blood lipids for coronary heart disease. *Eur Heart J*. 2015; 36(9):539–50. Epub 2014/01/30. <https://doi.org/10.1093/eurheartj/ehv571> PMID: 24474739; PubMed Central PMCID: PMC4344957.
4. Malik R, Georgakis MK, Vujkovic M, Damrauer SM, Elliott P, Karhunen V, et al. Relationship Between Blood Pressure and Incident Cardiovascular Disease: Linear and Nonlinear Mendelian Randomization Analyses. *Hypertension*. 2021; 77(6):2004–13. <https://doi.org/10.1161/HYPERTENSIONAHA.120.16534> PMID: 33813844

5. Fulcher J, O'Connell R, Voysey M, Emberson J, Blackwell L, Mihaylova B, et al. Efficacy and safety of LDL-lowering therapy among men and women: meta-analysis of individual data from 174,000 participants in 27 randomised trials. *Lancet*. 2015; 385(9976):1397–405. Epub 20150109. [https://doi.org/10.1016/S0140-6736\(14\)61368-4](https://doi.org/10.1016/S0140-6736(14)61368-4) PMID: 25579834.
6. Wang N, Fulcher J, Abey Suriya N, Park L, Kumar S, Di Tanna GL, et al. Intensive LDL cholesterol-lowering treatment beyond current recommendations for the prevention of major vascular events: a systematic review and meta-analysis of randomised trials including 327 037 participants. *Lancet Diabetes Endocrinol*. 2020; 8(1):36–49. [https://doi.org/10.1016/s2213-8587\(19\)30388-2](https://doi.org/10.1016/s2213-8587(19)30388-2) PMID: 31862150.
7. Ettehad D, Emdin CA, Kiran A, Anderson SG, Callender T, Emberson J, et al. Blood pressure lowering for prevention of cardiovascular disease and death: a systematic review and meta-analysis. *Lancet*. 2016; 387(10022):957–67. Epub 20151224. [https://doi.org/10.1016/S0140-6736\(15\)01225-8](https://doi.org/10.1016/S0140-6736(15)01225-8) PMID: 26724178.
8. Gill D, Georgakis MK, Zuber V, Karhunen V, Burgess S, Malik R, et al. Genetically predicted midlife blood pressure and coronary artery disease risk: Mendelian randomization analysis. *JAMA*. 2020; 9(14):e016773. <https://doi.org/10.1161/JAHA.120.016773> PMID: 32627641
9. Jansen SA, Huiskens B, Trompet S, Jukema J, Mooijaart SP, Willems van Dijk K, et al. Classical risk factors for primary coronary artery disease from an aging perspective through Mendelian Randomization. *GeroScience*. 2022; 44(3):1703–13. <https://doi.org/10.1007/s11357-021-00498-9> PMID: 34932184
10. Zheng J, Baird D, Borges MC, Bowden J, Hemani G, Haycock P, et al. Recent Developments in Mendelian Randomization Studies. *Curr Epidemiol Rep*. 2017; 4(4):330–45. Epub 20171122. <https://doi.org/10.1007/s40471-017-0128-6> PMID: 29226067; PubMed Central PMCID: PMC5711966.
11. Sudlow C, Gallacher J, Allen N, Beral V, Burton P, Danesh J, et al. UK biobank: an open access resource for identifying the causes of a wide range of complex diseases of middle and old age. *PLoS Med*. 2015; 12(3):e1001779. Epub 20150331. <https://doi.org/10.1371/journal.pmed.1001779> PMID: 25826379; PubMed Central PMCID: PMC4380465.
12. Manichaikul A, Mychaleckyj JC, Rich SS, Daly K, Sale M, Chen W-M. Robust relationship inference in genome-wide association studies. *Bioinformatics*. 2010; 26(22):2867–73. <https://doi.org/10.1093/bioinformatics/btq559> PMID: 20926424
13. Elliott P, Peakman TC. The UK Biobank sample handling and storage protocol for the collection, processing and archiving of human blood and urine. *Int J Epidemiol*. 2008; 37(2):234–44. <https://doi.org/10.1093/ije/dym276> PMID: 18381398.
14. Tobin MD, Sheehan NA, Scurrah KJ, Burton PR. Adjusting for treatment effects in studies of quantitative traits: antihypertensive therapy and systolic blood pressure. *Statistics in medicine*. 2005; 24(19):2911–35. <https://doi.org/10.1002/sim.2165> PMID: 16152135
15. Warren HR, Evangelou E, Cabrera CP, Gao H, Ren M, Mifsud B, et al. Genome-wide association analysis identifies novel blood pressure loci and offers biological insights into cardiovascular risk. *Nature Genetics*. 2017; 49(3):403–15. <https://doi.org/10.1038/ng.3768> PMID: 28135244
16. Willer CJ, Schmidt EM, Sengupta S, Peloso GM, Gustafsson S, Kanoni S, et al. Discovery and refinement of loci associated with lipid levels. *Nature Genetics*. 2013; 45(11):1274–83. <https://doi.org/10.1038/ng.2797> PMID: 24097068
17. Loh P-R, Tucker G, Bulik-Sullivan BK, Vilhjálmsson BJ, Finucane HK, Salem RM, et al. Efficient Bayesian mixed-model analysis increases association power in large cohorts. *Nature Genetics*. 2015; 47(3):284–90. <https://doi.org/10.1038/ng.3190> PMID: 25642633
18. Yavorska OO, Burgess S. MendelianRandomization: an R package for performing Mendelian randomization analyses using summarized data. *Int J Epidemiology*. 2017; 46(6):1734–9.
19. Verbanck M, Chen C-Y, Neale B, Do R. Detection of widespread horizontal pleiotropy in causal relationships inferred from Mendelian randomization between complex traits and diseases. *Nature Genetics*. 2018; 50(5):693–8. <https://doi.org/10.1038/s41588-018-0099-7> PMID: 29686387
20. Sanderson E, Spiller W, Bowden J. Testing and correcting for weak and pleiotropic instruments in two-sample multivariable Mendelian randomization. *Statistics in Medicine*. 2021; 40(25):5434–52. <https://doi.org/10.1002/sim.9133> PMID: 34338327
21. Jiang X, Holmes C, McVean G. The impact of age on genetic risk for common diseases. *PLoS Genetics*. 2021; 17(8):e1009723. <https://doi.org/10.1371/journal.pgen.1009723> PMID: 34437535
22. Armitage J, Baigent C, Barnes E, Betteridge DJ, Blackwell L, Blazing M, et al. Efficacy and safety of statin therapy in older people: a meta-analysis of individual participant data from 28 randomised controlled trials. *The Lancet*. 2019; 393(10170):407–15. [https://doi.org/10.1016/S0140-6736\(18\)31942-1](https://doi.org/10.1016/S0140-6736(18)31942-1) PMID: 30712900
23. Rahimi K, Bidel Z, Nazarzadeh M, Copland E, Canoy D, Wamil M, et al. Age-stratified and blood-pressure-stratified effects of blood-pressure-lowering pharmacotherapy for the prevention of cardiovascular

- disease and death: an individual participant-level data meta-analysis. *The Lancet*. 2021; 398 (10305):1053–64. [https://doi.org/10.1016/S0140-6736\(21\)01921-8](https://doi.org/10.1016/S0140-6736(21)01921-8) PMID: 34461040
24. Koopman C, Vaartjes I, Heintjes EM, Spiering W, van Dis I, Herings RM, et al. Persisting gender differences and attenuating age differences in cardiovascular drug use for prevention and treatment of coronary heart disease, 1998–2010. *Eur Heart J*. 2013; 34(41):3198–205. <https://doi.org/10.1093/eurheartj/ehz368> PMID: 24046432
  25. Salami JA, Warraich H, Valero-Elizondo J, Spatz ES, Desai NR, Rana JS, et al. National trends in statin use and expenditures in the US adult population from 2002 to 2013: insights from the medical expenditure panel survey. *JAMA Cardiology*. 2017; 2(1):56–65. <https://doi.org/10.1001/jamacardio.2016.4700> PMID: 27842171
  26. Coles S, Fisher L, Lin KW, Lyon C, Vosooney AA, Bird MD. Blood Pressure Targets in Adults With Hypertension: A Clinical Practice Guideline From the AAFP. *Am Fam Physician*. 2022; 106(6):Online. PMID: 36521481.
  27. Wang N, Woodward M, Huffman MD, Rodgers A. Compounding Benefits of Cholesterol-Lowering Therapy for the Reduction of Major Cardiovascular Events: Systematic Review and Meta-Analysis. *Circulation: Cardiovascular Quality and Outcomes*. 2022;10.1161/CIRCOUTCOMES.121.008552. <https://doi.org/10.1161/CIRCOUTCOMES.121.008552> PMID: 35430872
  28. group Sw, collaboration EC. SCORE2 risk prediction algorithms: new models to estimate 10-year risk of cardiovascular disease in Europe. *Eur Heart J*. 2021; 42(25):2439–54. <https://doi.org/10.1093/eurheartj/ehab309> PMID: 34120177
  29. Goff DC, Lloyd-Jones DM, Bennett G, Coady S, D'Agostino RB, Gibbons R, et al. 2013 ACC/AHA Guideline on the Assessment of Cardiovascular Risk. *Circulation*. 2014; 129(25\_suppl\_2):S49–S73. <https://doi.org/10.1161/01.cir.0000437741.48606.98> PMID: 24222018
  30. Sanderson E, Richardson TG, Morris TT, Tilling K, Davey Smith G. Estimation of causal effects of a time-varying exposure at multiple time points through multivariable mendelian randomization. *PLOS Genetics*. 2022; 18(7):e1010290. <https://doi.org/10.1371/journal.pgen.1010290> PMID: 35849575
